# Supplementary material for: Immunogenomic identification and characterization of granulocytic myeloid-derived suppressor cells in multiple myeloma
Source: Oxford University Press journal article supplement (doi:10.1182/blood.2019004537), 2020-04-23

## **Immunogenomic identification and characterization of granulocytic myeloid derived suppressor cells in multiple myeloma**

**Authors:** Cristina Perez <sup>1\*</sup>, Cirino Botta <sup>1,2\*</sup>, Aintzane Zabaleta <sup>1</sup>, Noemi Puig <sup>3</sup>, Maria-Teresa Cedena <sup>4</sup>, Ibai Goicoechea <sup>1</sup>, Daniel Alameda <sup>1</sup>, Edurne San José-Eneriz<sup>1</sup>, Juana Merino <sup>1</sup>, Paula Rodriguez-Otero <sup>1</sup>, Catarina Maia <sup>1</sup>, Diego Alignani <sup>1</sup>, Patricia Maiso <sup>1</sup>, Irene Manrique <sup>1</sup>, David Lara-Astiaso <sup>1</sup>, Amaia Vilas-Zornoza <sup>1</sup>, Sarai Sarvide <sup>1</sup>, Caterina Riillo <sup>5</sup>, Marco Rossi <sup>5</sup>, Laura Rosiñol <sup>6</sup>, Albert Oriol <sup>7</sup>, María-Jesús Blanchard <sup>8</sup>, Rafael Rios <sup>9</sup>, Anna Sureda <sup>10</sup>, Jesus Martin <sup>11</sup>, Rafael Martinez <sup>12</sup>, Joan Bargay <sup>13</sup>, Javier de la Rubia <sup>14,15</sup>, Miguel-Teodoro Hernandez <sup>16</sup>, Joaquin Martinez-Lopez <sup>4</sup>, Alberto Orfao <sup>17</sup>, Xabier Agirre <sup>1</sup>, Felipe Prosper <sup>1</sup>, Maria-Victoria Mateos <sup>3</sup>, Juan-José Lahuerta <sup>4</sup>, Joan Blade <sup>6</sup>, Jesús F. San-Miguel <sup>1</sup>, Bruno Paiva <sup>1</sup>, on behalf of the GEM (Grupo Español de Mieloma)/PETHEMA (Programa para el Estudio de la Terapéutica en Hemopatías Malignas) cooperative study group.

\* Have contributed equally to this study and should be considered as first authors.

**Affiliations:** 1) Clinica Universidad de Navarra, Centro de Investigacion Medica Aplicada (CIMA), Instituto de Investigacion Sanitaria de Navarra (IDISNA), CIBER-ONC numbers CB16/12/00369, CB16/12/00489, Pamplona, Spain; 2) Department of Oncohematology, “Annunziata” Hospital, Cosenza, Italy; 3) Hospital Universitario de Salamanca, Instituto de Investigacion Biomedica de Salamanca (IBSAL), Centro de Investigación del Cancer (IBMCC-USAL, CSIC), CIBER-ONC number CB16/12/00233 Salamanca, Spain; 4) Hospital 12 de Octubre, CIBER-ONC number CB16/12/00369, Madrid, Spain; 5) Department of Clinical and Experimental Medicine, “Magna Graecia” University of Catanzaro, Italy; 6) Hospital Clínic IDIBAPS, Barcelona, Spain; 7) Institut Català d’Oncologia i Institut Josep Carreras, Badalona, Spain; 8) Hospital Ramón y Cajal, Madrid, Spain; 9) Hospital Virgen de las Nieves, Granada, Spain; 10) Institut Català d’Oncologia-Hospitalet, IDIBELL, Barcelona. 11) Hospital Universitario Virgen del Rocío, Instituto de Biomedicina de Sevilla (IBIS/CSIC/CIBERONC CB16/12/00480); 12) Hospital Clínico San Carlos, Madrid; 13) Hospital Son Llatzer, Palma de Mallorca; 14) Hospital Universitario y Politécnico La Fe, Valencia; 15) School of Medicine and Dentistry, Catholic University of Valencia, Valencia; 16) Hospital Universitario de Canarias, Santa Cruz de Tenerife; 17) Cancer Research Center (IBMCC-CSIC/USAL-IBSAL); Cytometry Service (NUCLEUS) and Department of Medicine, University of Salamanca, Salamanca, Spain (USAL). Centro de Investigación Biomédica en Red de Cáncer, Instituto Carlos III, Madrid, Spain. CIBER-ONC number CB16/12/00400. Spain

**Address for correspondence:**

Bruno Paiva, Ph.D.

Clínica Universidad de Navarra; Centro de Investigación Médica Aplicada (CIMA)

Av. Pío XII 55, 31008 Pamplona, Spain

e-mail: bpaiva@unav.es

| Hospital                                        | Investigator                        |
|-------------------------------------------------|-------------------------------------|
| Complejo Hospitalario Costa del Sol             | Dra. María Casanova Espinosa        |
| H. Especialidades de Jerez de la Frontera       | Dr. José Luís Guzman Zamudio        |
| H. Nuestra Señora de Valme                      | Dr. Eduardo Ríos Herranz            |
| H. Universitario Virgen de las Nieves           | Dr. Rafael Ríos Tamayo              |
| Complejo Hospitalario Regional Virgen del Rocío | Dr. Jesús Martín Sánchez            |
| H. Clínico Universitario Lozano Blesa           | Dr. Luís Palomera Bernal            |
| H. Universitario Central de Asturias            | Dra. Ana Pilar González Rodríguez   |
| H. Cabueñes                                     | Dra. María Esther González García   |
| Complejo Asistencial Son Espases                | Dra. Antonia Sampol Mayol           |
| H. Son Llátzer                                  | Dr. Joan Bargay Lleonart            |
| H. de Gran Canaria Dr. Negrín                   | Dra. Alexia Suárez                  |
| H. Universitario de Canarias                    | Dr. Miguel Teodoro Hernández García |
| H. Universitario Marqués de Valdecilla          | Dra. Carmen Montes Gaisán           |
| H. General de Ciudad Real                       | Dra. Belén Hernández Ruiz           |
| Complejo Hospitalario de Toledo                 | Dr. Felipe Casado Montero           |
| H. Universitario de Guadalajara                 | Dra. Dunia de Miguel Llorente       |
| H. Nuestra Señora del Prado (Talavera)          | Dr. Fernando Solano Ramos           |
| H. General de Albacete                          | Dra. Ángela Ibañez García           |
| H. Clínico de Salamanca                         | Dra. Mariví Mateos Manteca          |
| Complejo Hospitalario H. General de Segovia     | Dr. José Mariano Hernández Martín   |

Defining G-MDSCs in the MM tumor microenvironment

|                                                                 |                                         |
|-----------------------------------------------------------------|-----------------------------------------|
| H. de León                                                      | Dr. Fernando Escalante Barrigón         |
| H. Universitario Río Hortega                                    | Dr. Javier García Frade                 |
| H. Clínico Universitario de Valladolid                          | Dr. Alfonso García de Coca              |
| H. Santa Bárbara                                                | Dr. Carlos Aguilar Franco               |
| Hospital Universitario de Burgos                                | Dr. Jorge Labrador Gómez:               |
| H. Althaia, Xarxa Asistencial de Manresa (Sant Joan de Deu)     | Dra. Elena Cabezudo Pérez               |
| H CLINIC                                                        | Dr. Joan Bladé Creixentí                |
| H. Durán i Reynals - ICO L'Hospitalet                           | Dra. Ana M <sup>a</sup> Sureda Balari   |
| <u>ICO Girona</u> , H. Universitario de Girona Dr. Josep Trueta | Dra. Yolanda González Montes            |
| H. UNIVERSITARI JOAN XXII DE TARRAGONA                          | Dra. Lourdes Escoda Teigell             |
| Hospital Universitari Arnau de Vilanova de Lleida               | Dr. Antonio García Guiñón               |
| H. del Mar                                                      | Dra. Eugenia Abella Monreal             |
| H. de Sabadell (Parc Taulí)                                     | Dr. Juan Alfonso Soler Campos           |
| Hospital Universitario Mútua de Terrassa                        | Dr. Josep M <sup>a</sup> Martí Tutusaus |
| H. Germans Trias i Pujol                                        | Dr. Albert Oriol Rocafiguera            |
| H. de la Santa Creu i Sant Pau                                  | Dr. Miquel Granell Gorrochategui        |
| H. Vall d'Hebrón                                                | Dra. Mercedes Gironella Mesa            |
| H. San Pedro de Alcántara (Complejo Hospitalario de Cáceres)    | Dra. Carmen Cabrera Silva               |
| Complejo Hospitalario Universitario de Santiago                 | Dra. Marta Sonia González Pérez         |
| Complejo Hospitalario de Pontevedra                             | Dra. Ana Dios Loureiro                  |
| Complejo Hospitalario de Ourense                                | José Angel Méndez Sánchez               |
| H. San Pedro                                                    | Dra. María Josefa Nájera Irazu          |
| H. Universitario Fundación de Alcorcón                          | Dr. Francisco Javier Peñalver Párraga   |
| H. Universitario 12 de Octubre                                  | Dr. Juan José Lahuerta Palacios         |
| H. de Fuenlabrada                                               | Dra. Pilar Bravo Barahona               |
| H. General Universitario Gregorio Marañón                       | Dra. Cristina Encinas Rodríguez         |
| H. Infanta Leonor                                               | Dr. José Ángel Hernández Rivas          |

Defining G-MDSCs in the MM tumor microenvironment

|                                                       |                                               |
|-------------------------------------------------------|-----------------------------------------------|
| H. Universitario Madrid - Sanchinarro                 | Dr. Jaime Pérez de Oteyza                     |
| Centro Oncológico MD Anderson                         | Dra. Rebeca Iglesias del Barrio               |
| H. Universitario La Paz                               | Dra. Ana López de la Guía                     |
| H. Universitario de la Princesa                       | Dr. Adrián Alegre Amor                        |
| Fundación Jiménez Díaz-UTE                            | Dra. Elena Prieto Pareja                      |
| Hospital Universitario Puerta de Hierro - Majadahonda | Dra. Isabel Krsnik Castelló                   |
| H. Ramón y Cajal                                      | Dra. M <sup>a</sup> Jesús Blanchard Rodríguez |
| H. Universitario de San Carlos                        | Dr. Rafael Martínez Martínez                  |
| H. Severo Ochoa                                       | Dra. Rosalía Ríaza Grau                       |
| H. INFANTA SOFÍA                                      | Dr. Eugenio Giménez Mesa                      |
| HOSPITAL DEL TAJO                                     | Dra. Elena Ruiz Sainz                         |
| H. Morales Meseguer                                   | Dr. Felipe de Arriba                          |
| H. Universitario Virgen de la Arrixaca                | Dr. Jose María Moraleda Jiménez               |
| H. General Universitario Santa Lucía                  | Dra. Marta Romera                             |
| Clínica Universidad de Navarra                        | Dr. Felipe Prósper Cardoso                    |
| Complejo Hospitalario de Navarra                      | Dr. José M <sup>a</sup> Arguiñano Pérez       |
| H. de Cruces                                          | Dra. María Puente Pomposo                     |
| H. de Txagorritxu                                     | Dr. Ernesto Pérez Persona                     |
| H. Clínico Universitario de Valencia                  | Dra. Ana Isabel Teruel Casasús                |
| H. Universitario Dr. Peset                            | Dra. Paz Ribas García                         |
| H. Universitario La Fe                                | Dr. Isidro Jarque Ramos                       |
| H. General Universitario de Alicante                  | Dra. María Blanca Villarrubia Lor             |
| H. TORREVIEJA SALUD UTE                               | Dr. Pedro Luis Fernández García               |
| H. del Vinalopo                                       | Dr. Pedro Luis Fernández García               |
| H. Quirón                                             | Dra. Carmen Martínez Chamorro                 |

**TABLE OF CONTENT**

**SUPPLEMENTAL METHODS ..... 6**

    Automated clustering ..... 6

    Cytospin ..... 6

    T cell proliferation ..... 6

    T cell immunosuppression ..... 6

    RNA sequencing (RNAseq) ..... 7

    Treatment with TGF $\beta$  ..... 7

    Assay for Transposase Accessible Chromatin with high-throughput sequencing (ATACseq) ..... 8

    Epigenetic targeting ..... 8

**REFERENCES .....10**

**Supplemental Table 1 ..... 13**

**Supplemental Figure 1 ..... 14**

**Supplemental Figure 2 ..... 15**

**Supplemental Figure 3 ..... 16**

**Supplemental Figure 4 ..... 17**

**Supplemental Figure 5 ..... 18**

**Supplemental Figure 6 ..... 19**

**Supplemental Figure 7 ..... 20**

**Supplemental Figure 8 ..... 21**

**Supplemental Figure 9 ..... 22**

**Supplemental Figure 10 ..... 23**

**Supplemental Figure 11 ..... 24**

## SUPPLEMENTAL METHODS

Automated clustering. We used FlowSOM<sup>17</sup> for automated clustering. Briefly, it works following a four-step approach: 1) reading data; 2) building a self-organizing map (SOM) for clustering and dimensionality reduction; 3) building a minimum spanning tree connecting nodes according to their similarity; 4) computing an automated meta-clustering by grouping similar nodes. The meta-clustering step is critical for the definition of cell populations. In this phase, groups of similar nodes are “fused” to obtain more consistent populations following specific algorithms. We used the ConsensusClusterPlus package separated from FlowSOM to obtain better control of each function. At this stage it is possible to decide the final number of clusters in which cells are being divided.

Cytospin. A total of  $1 \times 10^6$  cells from various neutrophil subsets were sorted in PBS. Afterwards, cells were attached to slides by cytocentrifugation (Thermo Fisher Scientific, Waltham, MA). Slides were stained following the May-Grünwald/Giemsa method and evaluated in an optical microscope (CX-21; Olympus, Tokyo, Japan). Images are shown with a 400x magnification.

**T cell proliferation.** The impact in T cell proliferation of various neutrophil subsets was evaluated through FACS sorting of each neutrophil subset and autologous T cells from bone marrow (BM) samples of multiple myeloma (MM) patients (N = 10) and healthy adults (HA) (N = 4). T cells were labelled with Violet Proliferation Dye (VPD) 450 (BD Horizon™) according to the manufacturer’s protocol. Afterwards,  $0.4 \times 10^5$  T cells were seeded per well in a 96-well U bottom plate previously coated with an anti-CD3 monoclonal antibody 2.5 µg/mL (overnight at 4°C, eBioscience™ San Diego, CA). This process was repeated for each neutrophil subsets, which were cultured with T cells in an E:T ratio of 1:1 in RPMI1640 medium (10% FBS, 1% L-Glu, 1% Penicillin-Streptomycin) and in presence of 1.2 µg/mL of an anti-CD28 monoclonal antibody (eBioscience™ San Diego, CA, USA). After a 4-day incubation at 37°C, cells were labelled with CD45-OC515, CD15-FITC, CD8-PE, 7AAD-PerCP-Cy5.5, CD4-PE-Cy7 and CD3-APCH7. Data acquisition was performed in a FACSCantoII flow cytometer and T cell proliferation was analyzed using the Infinicyt software, based on the diffusion of VPD to daughter cells.

**T cell immunosuppression.** We established unique culture conditions to evaluate the immunosuppressive potential of various neutrophil subsets after depleting a single subset in each condition (N = 10).  $0.25 \times 10^6$  cells per condition were seeded in a 96-well plate and cultured in presence or absence of 30 nM of a BCMAxCD3 bispecific antibody

in RPMI1640 medium (10% FBS, 1% L-Glu, 1% Penicillin-Streptomycin). After overnight incubation at 37°C, cells were labelled with CD11b-BV421, CD45-KromeOrange, CD38-FITC, CD229-PE, CD16-PerCP-Cy5.5, CD56-PE-Cy7, Annexin-V-APC and CD138-APCH7. MM cell death was determined according to the percentage of Annexin-V+ cells measured in a FACSCantoll flow cytometer. Data analysis was performed using the Infinicyt software.

**RNA sequencing (RNAseq).** Various neutrophil subsets were isolated from total BM samples of HA (N = 8) and MM patients (N = 8) in a FACS AriaII. Bulk RNAseq was obtained using a protocol adapted from single-cell massively parallel single-cell RNA-sequencing<sup>18</sup>, which enabled preparing libraries with as few as 20,000 cells as starting material. Briefly, we barcoded RNA from each sample in a retrotranscription (RT) reaction with AffinityScript Multiple Temperature Reverse Transcriptase (Agilent, Santa Clara, CA) and different RT primers. After qPCR, cDNA with similar Ct values were pooled together. cDNA was purified with SPRIselect 1.2X (Beckman Coulter –BC-, Brea, CA) and amplified using the T7 promotor as template previously introduced in the RT reaction. T7 polymerase (NEB) was added for 16 hours at 37°C. RNA molecules were fragmented with 2µL of 10X Zn<sup>2+</sup> fragmentation buffer (Ambion™, ThermoFisher) for 1 min at 70°C and purified with SPRIselect 2X. Afterwards, a ssRNA adaptor (Illumina, San Diego, CA) was ligated to the 3'-end of the RNA fragments in presence of DMSO, 100 mM ATP, 50% PEG and T4 RNA ligase I (NEB) for 2 hours at 22°C. A second RT reaction was performed with AffinityScript Multiple Temperature Reverse Transcriptase and resulting cDNA was purified with SPRIselect 1.5X. Finally, cDNA was amplified with 12.5µL Kappa Hifi ready mix + 1µL 25 µM primer mix per sample and purified with SPRIselect 0.7X. Qubit, TapeStation and qPCR analysis were done as quality controls and 4 nM of the final library were sequenced in a NextSeq (Illumina).

Differential gene expression across all pairwise comparisons between groups was analyzed with Deseq2 R package followed by k-means clustering of genes in R. A one-way ANOVA with multiple comparisons was used to determine the significance of differential gene expression across each neutrophil subset, between neutrophils derived from HA and MM patients, between neutrophils derived from peripheral blood or bone marrow and before and after treatment with hypomethylating agents. Genes with a  $P < 0.05$  were used for gene ontology analysis and gene set enrichment analysis using the *clusterprofiler* and *fgsea* R packages, respectively.

**Treatment with TGF-β.** We exposed whole PB from HA (N = 3) to 1ng/mL of TGF-β for 48 hours. After incubation at 37°C, cells were labelled with SYTOX™ Blue (Thermo

Fisher Scientific, MA, USA), CD15-FITC, CD13-PE, CD45-PerCP-Cy5.5, CD16-PE-Cy7 and CD11b-APC and mature neutrophils were stored in Lysis/Binding Buffer (Invitrogen™, CA, USA) for RNAseq using the protocols described above.

**Assay for Transposase Accessible Chromatin with high-throughput sequencing (ATACseq).** Approximately 20,000 cells of various neutrophils subsets were FACSsorted from total BM samples of HA (N = 3) or MM patients (N = 3), and placed in a PCR tube with 100µL of PBS+BSA 0.05%. After centrifugation (500g, 4°C, 10 min), the pellet was suspended in 25µL of the transposase reaction mixture (15µL of Buffer TD2x (Illumina), 1µL of TDE1 enzyme (Illumina), 0.25µL of 5% digitonin (Promega) and 8.75µL of nuclease-free water). The resulting mix was incubated at 37°C for 30 min at 450 rpm. Afterwards, the transposase reaction was stopped on ice and 5µL of clean up buffer, 2µL of 5% SDS and 2µL of Proteinase K (New England Biolabs) were added to the previous mix and incubated for 30 min at 40°C. Transposase-reaction products were cleaned up with AMPure magnetic beads 2X (BC). Finally, the DNA fragments were amplified with 22µL Kappa Hifi ready mix + 4µL of primer 1 i5 and 2 i7 mix per sample. Library was purified with AMPure magnetic beads 2X. Quality control was performed with Qubit and TapeStation, and 4 nM of the final library were sequenced in a NextSeq.

ATACseq reads were aligned to the hg19 genome build using bowtie2 with default parameters (except commands adapted for these specific data such as --very-sensitive and --non-deterministic options that improve accuracy and results when there are many identical reads) and filtered based on mapping score (MAPQ ≥ 30) by Samtools version 1.3.159. The MACS2 version 2.1.0 was used to identify peaks for each sample with default settings. *ChiPQC* package was used for quality control and blacklisted peaks removal. *ChipSeeker* was used to assess overlap of differential peaks and relate peaks to annotated transcription start sites using default options. DESeq2 was used to normalize and identify differential peaks across treatment conditions with p-value <0.05. *Clusterprofiler* R package was used to perform a gene ontology analysis.

**Epigenetic targeting.** We treated whole BM samples from MM patients (N = 3) with a selective and reversible inhibitor of histone methyltransferase G9a and DNA-methyltransferase<sup>24</sup> (CM-272), testing two different drug concentrations (250 and 500 nM). Approximately 3x10<sup>6</sup> cells were seeded per well in a 24-well plate and left in culture for 48 hours. Cells were treated at time 0 and +24 hours. After incubation at 37°C, cells were labelled with SYTOX™ Blue (Thermo Fisher Scientific, MA, USA), CD15-FITC, CD13-PE, CD45-PerCP-Cy5.5, CD16-PE-Cy7 and CD11b-APC to evaluate the distribution of neutrophil subsets after drug exposure. We also investigated a possible



synergic effect between CM-272 and a BCMAxCD3 bispecific antibody in two functional assays. First, we analyzed the immunosuppressive potential of various neutrophils subsets present in BM samples of MM patients (N = 5) after depleting a single subset with FACS. A total of  $0.25 \times 10^6$  cells per condition were seeded in a 96-well plate and pre-incubated for 2-hours with CM-272 (10nM) at 37°C. After washing to remove the compound,  $0.5 \times 10^5$  H929 MM cells were added to the culture followed by incubation with a BCMAxCD3 bispecific antibody (30nM) for 24-hours at 37°C in RPMI1640 medium (10% FBS, 1% L-Glu, 1% Penicillin-Streptomycin). Secondly, we analyzed the cytotoxic effect of T cells in the presence of each neutrophil subset, sorted from BM samples of MM patients (N = 5). A total of  $0.5 \times 10^5$  cells were seeded in a 96-well plate. Neutrophils were preincubated for 2-hours with CM-272 (10nM) at 37°C. After washing to remove the compound,  $0.5 \times 10^5$  H929 MM cells and  $0.5 \times 10^5$  T cells were added to the culture and incubated with a BCMAxCD3 bispecific antibody (30nM) for 24-hours at 37°C in RPMI1640 medium. Cells were labelled with CD11b-BV421, CD45-KromeOrange, CD38-FITC, CD229-PE, CD16-PerCP-Cy5.5, CD56-PE-Cy7, Annexin-V-APC and CD138-APCH7. MM cell death was determined according to the percentage of Annexin-V+ H929 cells measured in a FACSCantoll flow cytometer. Data analysis was performed using the Infinicyt software.

## REFERENCES

1. Gabrilovich DI, Ostrand-Rosenberg S, Bronte V. Coordinated regulation of myeloid cells by tumours. *Nat Rev Immunol*. 2012;12(4):253-268.
2. Botta C, Gulla A, Correale P, Tagliaferri P, Tassone P. Myeloid-derived suppressor cells in multiple myeloma: pre-clinical research and translational opportunities. *Front Oncol*. 2014;4:348.
3. Gabrilovich DI, Nagaraj S. Myeloid-derived suppressor cells as regulators of the immune system. *Nat Rev Immunol*. 2009;9(3):162-174.
4. Giese MA, Hind LE, Huttenlocher A. Neutrophil plasticity in the tumor microenvironment. *Blood*. 2019;133(20):2159-2167.
5. Bronte V, Brandau S, Chen SH, et al. Recommendations for myeloid-derived suppressor cell nomenclature and characterization standards. *Nat Commun*. 2016;7:12150.
6. Greten TF, Manns MP, Korangy F. Myeloid derived suppressor cells in human diseases. *Int Immunopharmacol*. 2011;11(7):802-807.
7. De Veirman K, Van Valckenborgh E, Lahmar Q, et al. Myeloid-derived suppressor cells as therapeutic target in hematological malignancies. *Front Oncol*. 2014;4:349.
8. Malek E, de Lima M, Letterio JJ, et al. Myeloid-derived suppressor cells: The green light for myeloma immune escape. *Blood Rev*. 2016;30(5):341-348.
9. Ramachandran IR, Martner A, Pisklakova A, et al. Myeloid-derived suppressor cells regulate growth of multiple myeloma by inhibiting T cells in bone marrow. *J Immunol*. 2013;190(7):3815-3823.
10. Tadmor T. The growing link between multiple myeloma and myeloid derived suppressor cells. *Leuk Lymphoma*. 2014;55(12):2681-2682.
11. Krejcik J, Casneuf T, Nijhof IS, et al. Daratumumab depletes CD38+ immune regulatory cells, promotes T-cell expansion, and skews T-cell repertoire in multiple myeloma. *Blood*. 2016;128(3):384-394.
12. De Veirman K, Menu E, Maes K, et al. Myeloid-derived suppressor cells induce multiple myeloma cell survival by activating the AMPK pathway. *Cancer Lett*. 2019;442:233-241.
13. Wang J, De Veirman K, De Beule N, et al. The bone marrow microenvironment enhances multiple myeloma progression by exosome-mediated activation of myeloid-derived suppressor cells. *Oncotarget*. 2015;6(41):43992-44004.
14. Rosinol L, Oriol A, Rios R, et al. Bortezomib, lenalidomide, and dexamethasone as induction therapy prior to autologous transplant in multiple myeloma. *Blood*. 2019;134(16):1337-1345.

15. Paiva B, Puig N, Cedena MT, et al. Measurable Residual Disease by Next-Generation Flow Cytometry in Multiple Myeloma. *J Clin Oncol*. 2019;JCO1901231.
16. Chesney JA, Mitchell RA, Yaddanapudi K. Myeloid-derived suppressor cells—a new therapeutic target to overcome resistance to cancer immunotherapy. *J Leukoc Biol*. 2017;102(3):727-740.
17. Van Gassen S, Callebaut B, Van Helden MJ, et al. FlowSOM: Using self-organizing maps for visualization and interpretation of cytometry data. *Cytometry A*. 2015;87(7):636-645.
18. Flores-Montero J, Sanoja-Flores L, Paiva B, Puig N, García-Sánchez O, Böttcher S, et al. Next Generation Flow for highly sensitive and standardized detection of minimal residual disease in multiple myeloma. *Leukemia*. 2017;31(10):2094–103.
19. Alameda D, Saez B, Lara-Astiaso D, et al. Characterization of freshly isolated mesenchymal stromal cells from healthy and multiple myeloma bone marrow: transcriptional modulation of the microenvironment. *Haematologica*. 2020.
20. Gorgun GT, Whitehill G, Anderson JL, et al. Tumor-promoting immune-suppressive myeloid-derived suppressor cells in the multiple myeloma microenvironment in humans. *Blood*. 2013;121(15):2975-2987.
21. Frassanito MA, De Veirman K, Desantis V, et al. Halting pro-survival autophagy by TGFbeta inhibition in bone marrow fibroblasts overcomes bortezomib resistance in multiple myeloma patients. *Leukemia*. 2016;30(3):640-648
22. Lu A, Pallero MA, Lei W, et al. Inhibition of Transforming Growth Factor-beta Activation Diminishes Tumor Progression and Osteolytic Bone Disease in Mouse Models of Multiple Myeloma. *Am J Pathol*. 2016;186(3):678-690.
23. Lu A, Pallero MA, Lei W, et al. Inhibition of Transforming Growth Factor-beta Activation Diminishes Tumor Progression and Osteolytic Bone Disease in Mouse Models of Multiple Myeloma. *Am J Pathol*. 2016;186(3):678-690.
24. San Jose-Eneriz E, Agirre X, Rabal O, et al. Discovery of first-in-class reversible dual small molecule inhibitors against G9a and DNMTs in hematological malignancies. *Nat Commun*. 2017;8:15424.
25. Facon T, Kumar S, Plesner T, et al. Daratumumab plus Lenalidomide and Dexamethasone for Untreated Myeloma. *N Engl J Med*. 2019;380(22):2104-2115.
26. Mateos MV, Hernandez MT, Giraldo P, et al. Lenalidomide plus dexamethasone for high-risk smoldering multiple myeloma. *N Engl J Med*. 2013;369(5):438-447.
27. Raje N, Berdeja J, Lin Y, et al. Anti-BCMA CAR T-Cell Therapy bb2121 in Relapsed or Refractory Multiple Myeloma. *N Engl J Med*. 2019;380(18):1726-1737.
28. Gabrilovich DI, Bronte V, Chen SH, et al. The terminology issue for myeloid-derived suppressor cells. *Cancer Res*. 2007;67(1):425; author reply 426.

29. Sagiv JY, Michaeli J, Assi S, et al. Phenotypic diversity and plasticity in circulating neutrophil subpopulations in cancer. *Cell Rep.* 2015;10(4):562-573.
30. Pillay J, Tak T, Kamp VM, Koenderman L. Immune suppression by neutrophils and granulocytic myeloid-derived suppressor cells: similarities and differences. *Cell Mol Life Sci.* 2013;70(20):3813-3827.
31. Damasceno D, Andres MP, van den Bossche WB, et al. Expression profile of novel cell surface molecules on different subsets of human peripheral blood antigen-presenting cells. *Clin Transl Immunology.* 2016;5(9):e100.
32. Condamine T, Mastio J, Gabrilovich DI. Transcriptional regulation of myeloid-derived suppressor cells. *J Leukoc Biol.* 2015;98(6):913-922.
33. Fan C, Stendahl U, Stjernberg N, Beckman L. Association between orosomucoid types and cancer. *Oncology.* 1995;52(6):498-500.
34. Yuan M, Zhu H, Xu J, Zheng Y, Cao X, Liu Q. Tumor-Derived CXCL1 Promotes Lung Cancer Growth via Recruitment of Tumor-Associated Neutrophils. *J Immunol Res.* 2016;2016:6530410.
35. Ng LG, Ostuni R, Hidalgo A. Heterogeneity of neutrophils. *Nat Rev Immunol.* 2019;19(4):255-265.
36. Andzinski L, Kasnitz N, Stahnke S, et al. Type I IFNs induce anti-tumor polarization of tumor associated neutrophils in mice and human. *Int J Cancer.* 2016;138(8):1982-1993.
37. Pylaeva E, Lang S, Jablonska J. The Essential Role of Type I Interferons in Differentiation and Activation of Tumor-Associated Neutrophils. *Front Immunol.* 2016;7:629.
38. Jaitin DA, Keningsberg E, Keren-Shaul H, et al. Massively parallel single-cell RNA-seq for marker-free decomposition of tissues into cell types. *Science.* 2014;343(6172):776-779.

**Supplemental Table 1.** KEGG cytokine-cytokine receptor interaction pathway list.

|            |        |        |         |           |           |
|------------|--------|--------|---------|-----------|-----------|
| AC005840.1 | CCR6   | EPO    | IL12RB1 | IL7R      | TNFRSF11B |
| ACVR1      | CCR7   | EPOR   | IL12RB2 | IL8       | TNFRSF12A |
| ACVR1B     | CCR8   | FAS    | IL13    | IL9       | TNFRSF13B |
| ACVR2A     | CCR9   | FASLG  | IL13RA1 | IL9R      | TNFRSF13C |
| ACVR2B     | CD27   | FLT1   | IL15    | INHBA     | TNFRSF14  |
| ACVRL1     | CD40   | FLT3   | IL15RA  | INHBB     | TNFRSF17  |
| AMH        | CD40LG | FLT3LG | IL17A   | INHBC     | TNFRSF18  |
| AMHR2      | CD70   | FLT4   | IL17B   | INHBE     | TNFRSF19  |
| BMP2       | CLCF1  | GDF5   | IL17RA  | KDR       | TNFRSF1A  |
| BMP7       | CNTF   | GH1    | IL17RB  | KIT       | TNFRSF1B  |
| BMPR1A     | CNTFR  | GH2    | IL18    | KITLG     | TNFRSF21  |
| BMPR1B     | CRLF2  | GHR    | IL18R1  | LEP       | TNFRSF25  |
| BMPR2      | CSF1   | HGF    | IL18RAP | LEPR      | TNFRSF4   |
| CCL1       | CSF1R  | IFNA1  | IL19    | LIF       | TNFRSF6B  |
| CCL11      | CSF2   | IFNA10 | IL1A    | LIFR      | TNFRSF8   |
| CCL13      | CSF2RA | IFNA13 | IL1B    | LTA       | TNFRSF9   |
| CCL14      | CSF2RB | IFNA14 | IL1R1   | LTB       | TNFSF10   |
| CCL15      | CSF3   | IFNA16 | IL1R2   | MET       | TNFSF11   |
| CCL16      | CSF3R  | IFNA17 | IL1RAP  | MPL       | TNFSF12   |
| CCL17      | CTF1   | IFNA2  | IL2     | NGFR      | TNFSF13   |
| CCL18      | CX3CL1 | IFNA21 | IL20    | OSM       | TNFSF13B  |
| CCL19      | CX3CR1 | IFNA4  | IL20RA  | OSMR      | TNFSF14   |
| CCL2       | CXCL1  | IFNA5  | IL20RB  | PDGFA     | TNFSF15   |
| CCL20      | CXCL10 | IFNA6  | IL21    | PDGFB     | TNFSF18   |
| CCL21      | CXCL11 | IFNA7  | IL21R   | PDGFC     | TNFSF4    |
| CCL22      | CXCL12 | IFNA8  | IL22    | PDGFRA    | TNFSF8    |
| CCL23      | CXCL13 | IFNAR1 | IL22RA1 | PDGFRB    | TNFSF9    |
| CCL24      | CXCL14 | IFNAR2 | IL22RA2 | PF4       | TPO       |
| CCL25      | CXCL16 | IFNB1  | IL23A   | PF4V1     | TSLP      |
| CCL26      | CXCL2  | IFNE   | IL23R   | PLEKHO2   | VEGFA     |
| CCL27      | CXCL3  | IFNG   | IL24    | PPBP      | VEGFB     |
| CCL28      | CXCL5  | IFNGR1 | IL25    | PPBPP1    | VEGFC     |
| CCL3       | CXCL6  | IFNGR2 | IL26    | PRL       | VEGFD     |
| CCL3L1     | CXCL8  | IFNK   | IL2RA   | PRLR      | XCL1      |
| CCL3L3     | CXCL9  | IFNL1  | IL2RB   | RELT      | XCL2      |
| CCL4       | CXCR1  | IFNL2  | IL2RG   | TGFB1     | XCR1      |
| CCL4L2     | CXCR2  | IFNL3  | IL3     | TGFB2     | HIF1A     |
| CCL5       | CXCR3  | IFNLR1 | IL3RA   | TGFB3     | CEBPB     |
| CCL7       | CXCR4  | IFNW1  | IL4     | TGFBR1    | STAT1     |
| CCL8       | CXCR5  | IL10   | IL4R    | TGFBR2    | STAT3     |
| CCR1       | CXCR6  | IL10RA | IL5     | TNF       | NOS2      |
| CCR10      | EDA    | IL10RB | IL5RA   | TNFRSF10A | ARG1      |
| CCR2       | EDA2R  | IL11   | IL6     | TNFRSF10B | PTGS2     |
| CCR3       | EDAR   | IL11RA | IL6R    | TNFRSF10C | PTGES2    |
| CCR4       | EGF    | IL12A  | IL6ST   | TNFRSF10D | S100A8    |
| CCR5       | EGFR   | IL12B  | IL7     | TNFRSF11A | S100A9    |

**Supplemental Figure 1.** Semi-automated pipeline that performs batch-analyses of flow cytometry data to avoid variability intrinsic to manual analysis, and unveils full cellular diversity based on unbiased clustering. This strategy allowed the systematic identification and quantification of a variable number of cell clusters, which grouped according to the similarity of antigen expression profiles by using the bioinformatic algorithm FlowSOM.

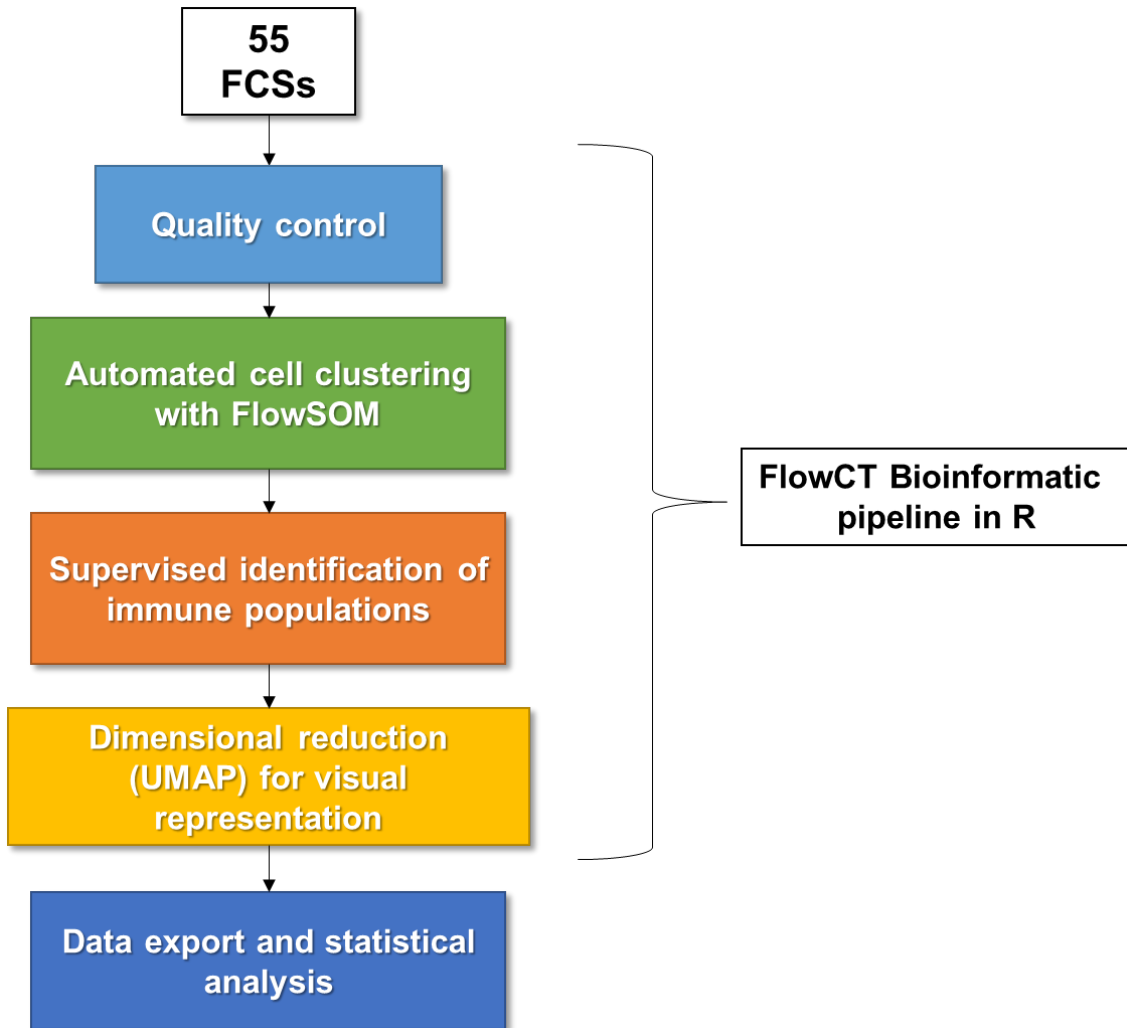

**Supplemental Figure 2. Characterization of G-MDSCs based on conventional criteria.** Flow cytometry analysis using the conventional gating strategy for G-MDSCs based on the expression of CD11b, CD14, CD15, CD33 and HLA-DR antigens. CD11b<sup>+</sup>CD14<sup>-</sup>CD15<sup>+</sup>CD33<sup>+</sup>HLA-DR<sup>-</sup> cells included a mixture of immature and mature neutrophil subsets plus eosinophils.

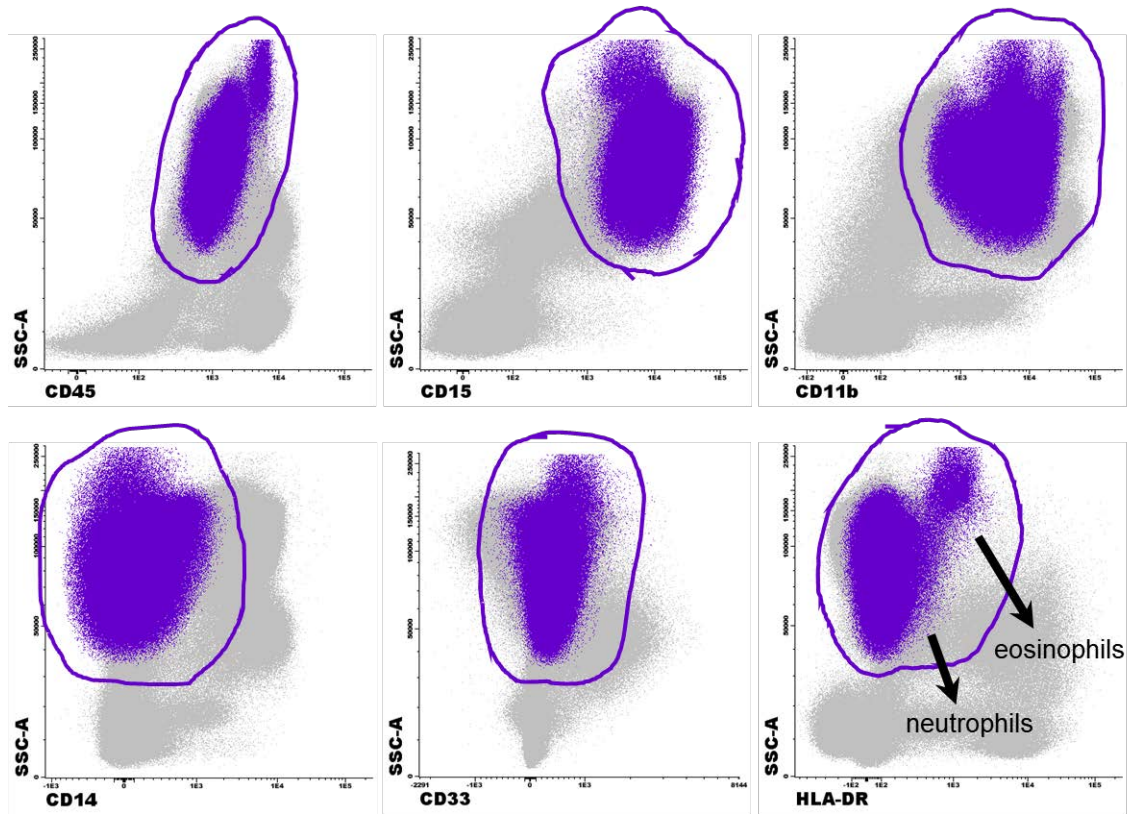

**Supplemental Figure 3.** Phenotypic and transcriptional profile of mature neutrophils present in matched BM and PB samples from MM patients. (A) Flow cytometry analysis of neutrophils from paired samples of BM and PB (N = 5) show no differences in the immunophenotype of BM and PB neutrophils. Boxes represent the mean and lines the standard deviation (from five independent experiments. (B) Principal component analysis of BM and PB neutrophils show that circulating mature neutrophils overlap with BM mature neutrophils. Lines represent the standard deviation and dots the median values. (C) Transcriptomic signature of mature BM and PB neutrophils show that circulating neutrophils from MM patients cluster with patient-matched BM neutrophils rather than with mature neutrophils from HA.

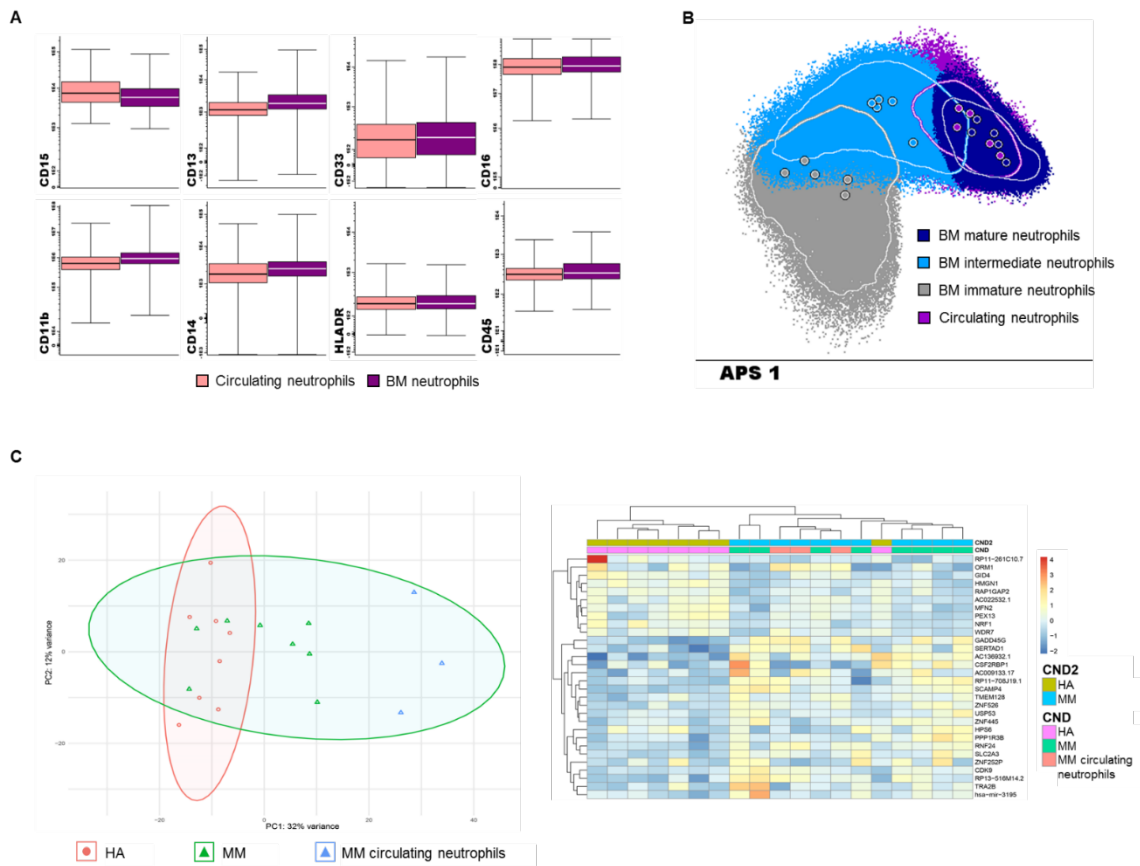



**Supplemental Figure 4. Daratumumab has no long-term in vitro effect on BM granulocytes from MM patients.** (A) BM samples from MM patients (N = 3) were cultured in an organoid 3D model to enable long-term treatment. (B) After 10-day treatment, daratumumab induced a significant depletion of tumor plasma cells. (C) No significant differences in the percentage of CD11b+CD14-CD15+CD33+HLADR- cells. Bar graphs represent the mean and lines the standard deviation. The statistical significance was evaluated using the t-Student test. (D) or any other granulocytic subsets before and after treatment. (E) Flow cytometry analysis of BM samples from MM patients (N = 36) before and after treatment with daratumumab show no significant differences in each granulocytic subset.

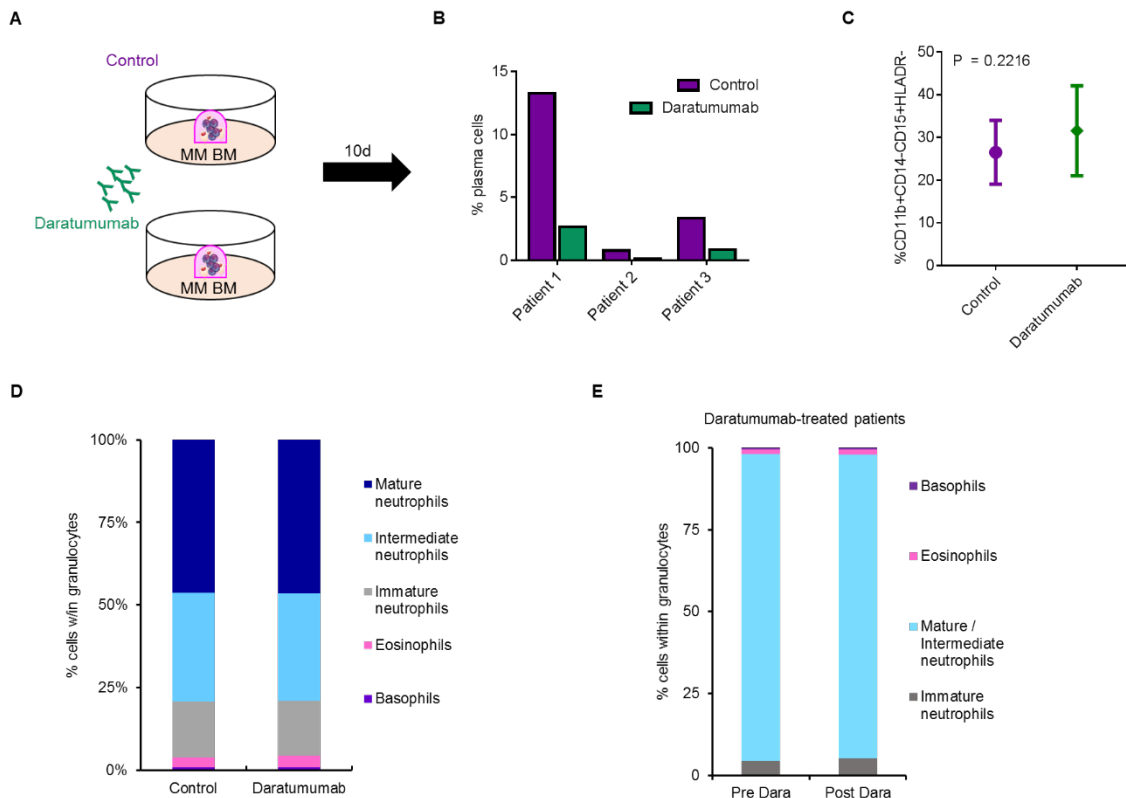

**Supplemental Figure 5.** (A) Correlations between granulocytic subsets and other BM populations (nucleated red blood cells –NRBCs-, T cells and tumor cells) with clinical parameters. (B) Progression-free survival according to high vs low abundance of intermediate and immature neutrophils, eosinophils and basophils). Boxes represent the mean and lines the standard deviation.

A

|                                     | Basophils | Eosinophils | Mature neutrophils | Intermediate neutrophils | Immature neutrophils | NRBCs        | T cells      | Tumor cells  |
|-------------------------------------|-----------|-------------|--------------------|--------------------------|----------------------|--------------|--------------|--------------|
| ISS (I vs II vs III)                | 0.734     | 0.433       | 0.449              | 0.250                    | 0.868                | 0.232        | <b>0.020</b> | <b>0.010</b> |
| cytogenetic (high vs standard risk) | 0.975     | 0.337       | 0.597              | 0.808                    | 0.150                | <b>0.011</b> | 0.624        | 0.869        |
| LDH (normal vs ULN)                 | 0.193     | 0.315       | 0.246              | 0.824                    | 0.632                | 0.541        | <b>0.046</b> | 0.345        |

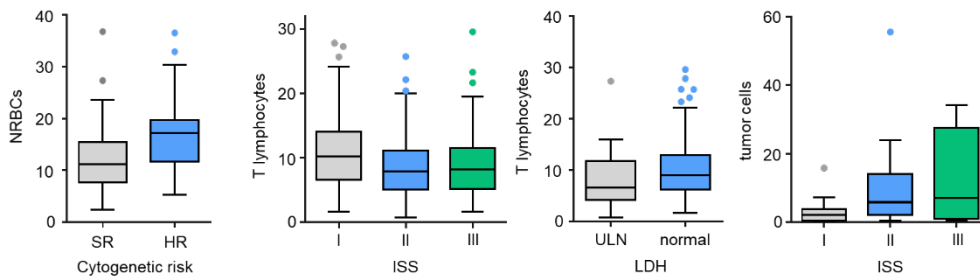

B

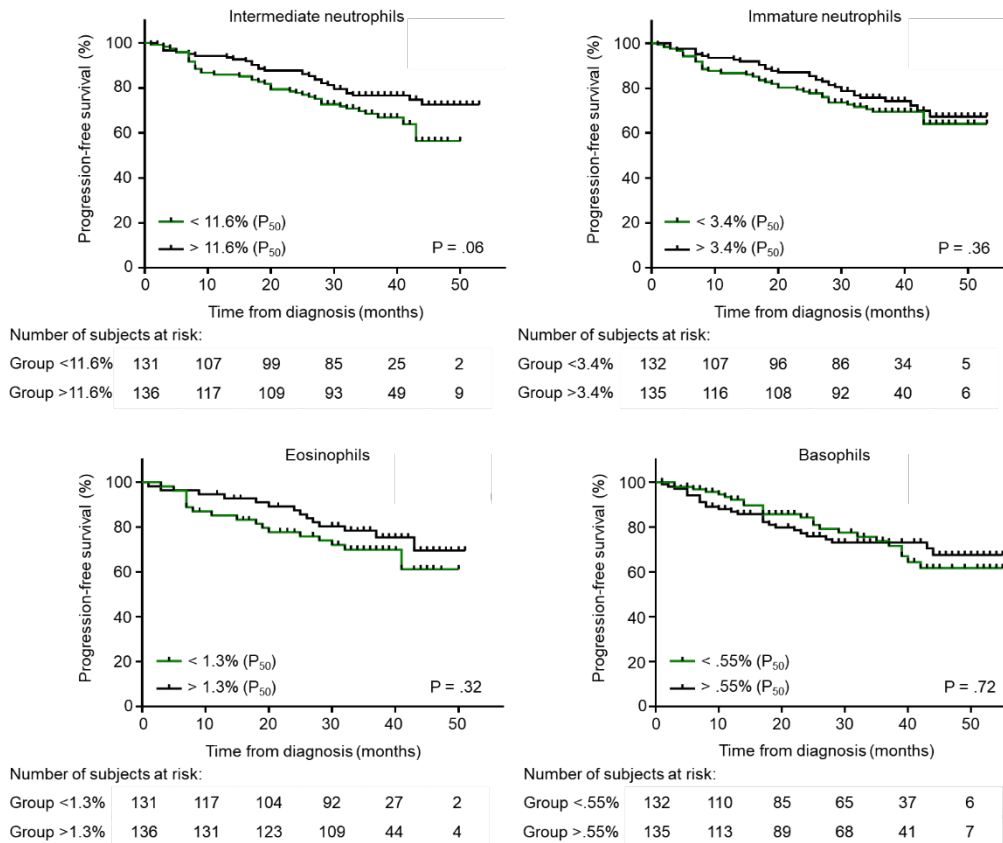

**Supplemental Figure 6.** (A and B) Graphical representation of 21 genes from the KEGG cytokine-cytokine receptor interaction pathway list, which displayed significantly different expression levels in immature, intermediate and mature neutrophils from healthy adults (N = 8) and multiple myeloma (MM) patients (N = 8). Patterns of gene expression were similar in HA and MM patients with the exception of a significant and progressive upregulation of VEGFA and TGFB1 and a lack of increase of CXCL1 in MM neutrophils. (C) All genes with significant differences in expression levels found in mature neutrophils from HA and MM patients.

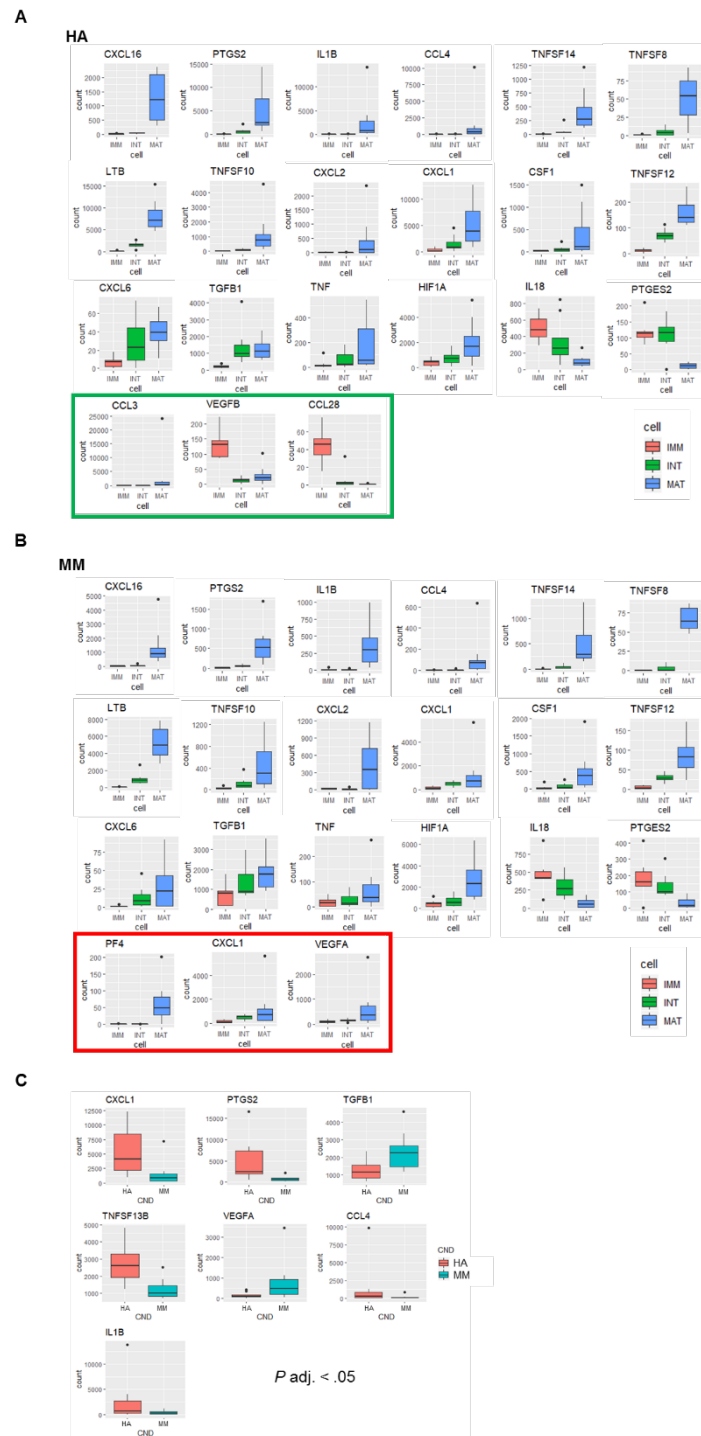

**Supplemental Figure 7. Molecular characterization of neutrophil differentiation in the BM of HA and MM patients.** Unsupervised clustering of RNAseq data showed incomplete segregation between HA and MM regarding the transcriptional profile of **(A)** immature and **(B)** intermediate neutrophils.

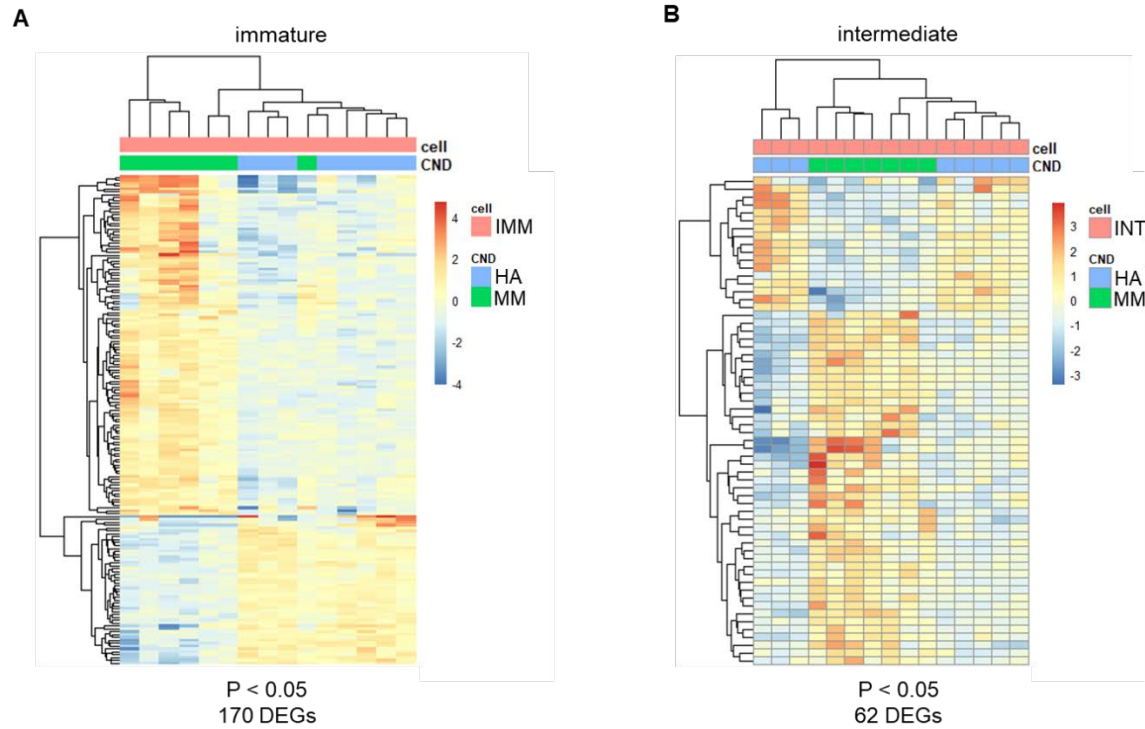

**Supplemental Figure 8.** Genes coding for cytokines/chemokines with significantly different expression in mesenchymal stromal cells from bone marrow aspirates of healthy adults (HA, N = 8) and multiple myeloma (MM) patients (N = 56). No differences were noted in TGF- $\beta$  expression.

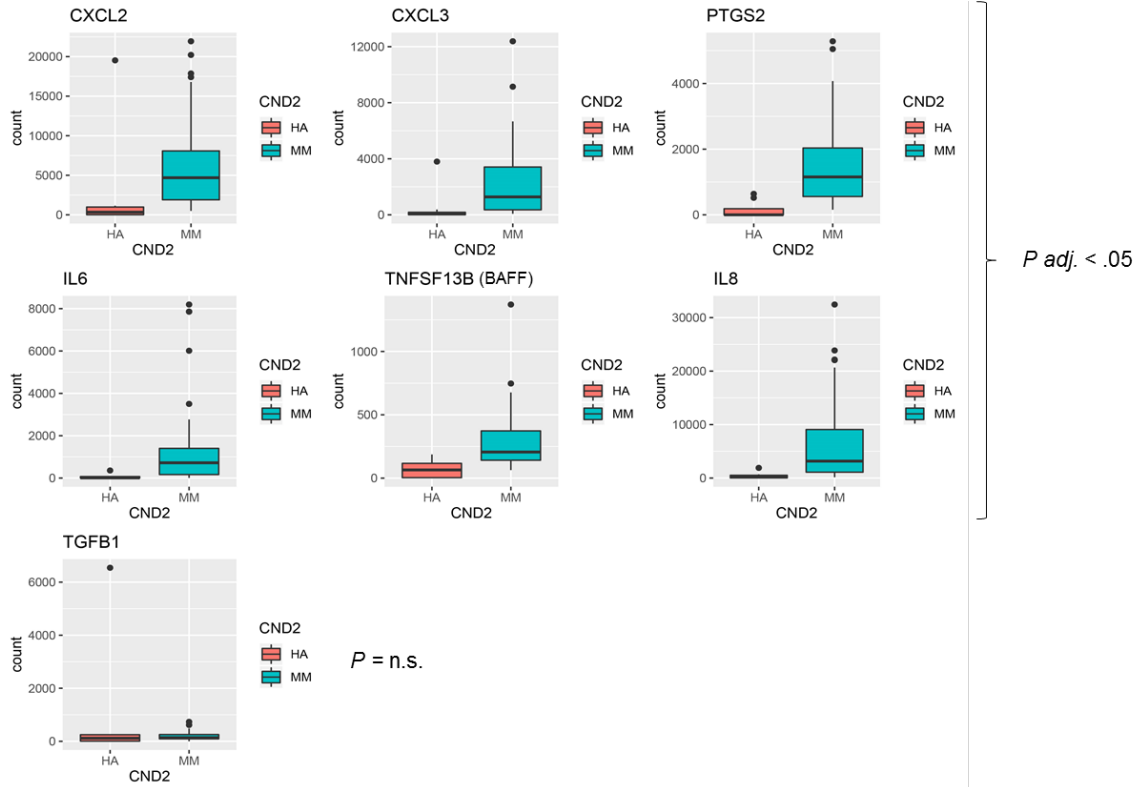

**Supplemental Figure 9. The transcriptional network of mature neutrophils is epigenetically deregulated in MM.**

**(A)** Differential open chromatin sites (peaks) were annotated to the nearest gene based on their distance to transcription start sites (TSS). 50% of these peaks were in potential promoter regions within 3 kb of a TSS, suggesting that these gains/losses in accessibility could exert regulatory activity. **(B)** Significant correlation between gains or losses of chromatin accessibility near TSS and gene expression for each normal and tumor derived neutrophil samples based on paired ATACseq and RNAseq data. **(C)** *CD83* showed significantly higher mRNA expression in MM vs HA as well as concordant transcriptional and chromatin accessibility data. Flow cytometry data show increased protein expression in MM in accordance to molecular data. Boxes represent the mean and lines the standard deviation (from three independent experiments).

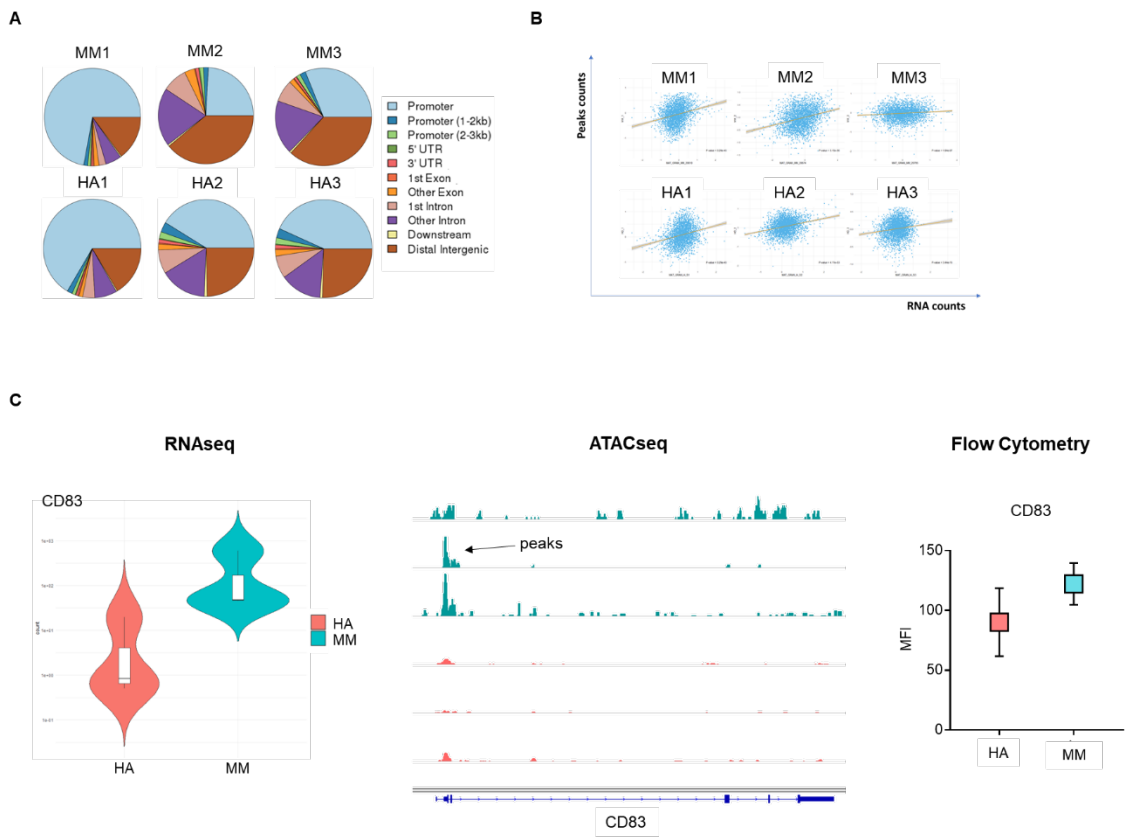

**Supplemental Figure 10.** Mode of action of CM-272 was confirmed by validating the induced expression of several type I IFN related genes described below.

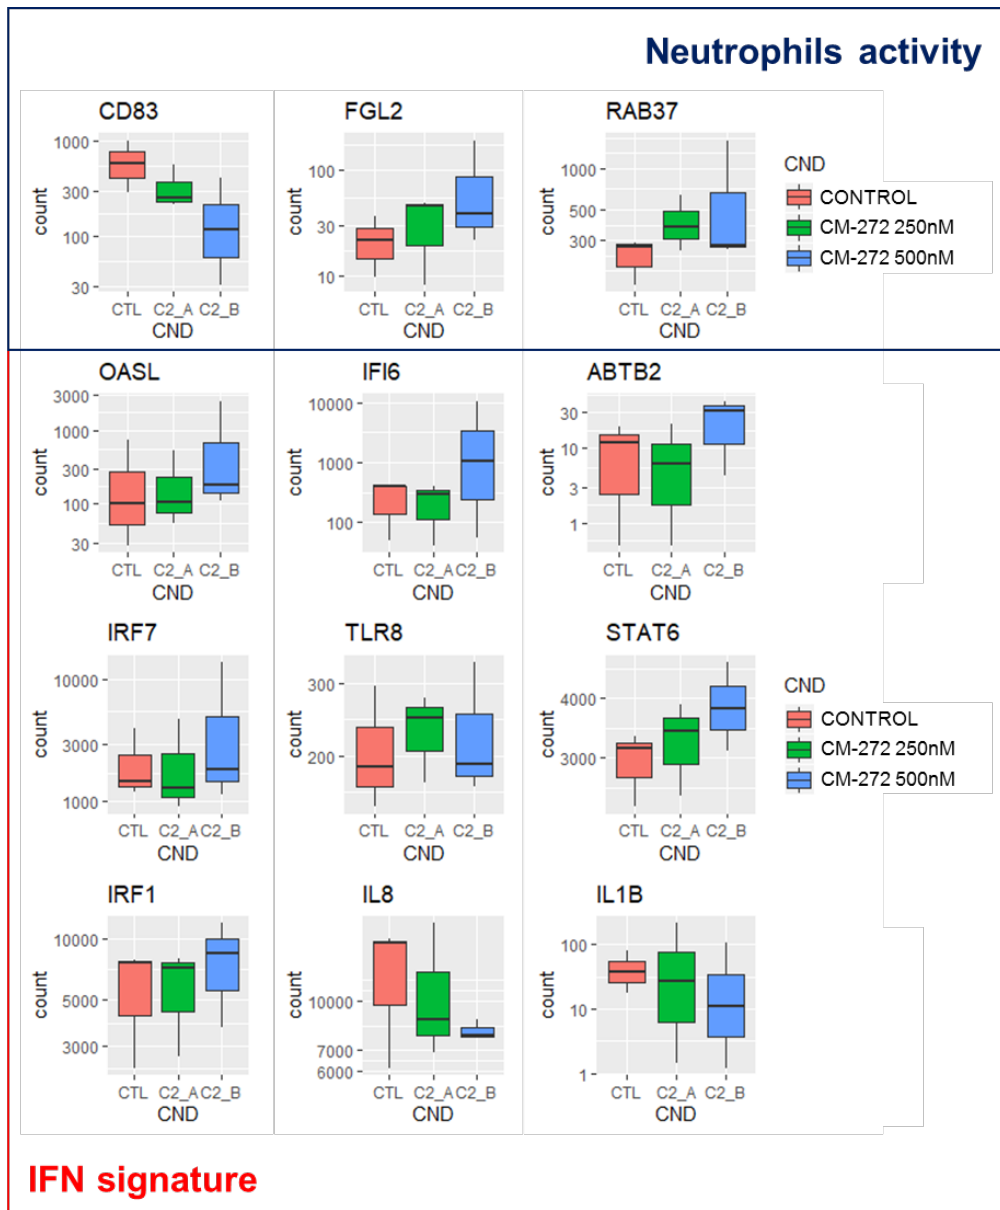

**Supplemental Figure 11.** Combination of CM-272 and a BCMAxCD3 bispecific antibody show that CM-272 is able to abrogate the immunosuppressive activity exerted by mature neutrophils. The combination significantly increased the activity of T cells against H929 MM cells when compared to single-agent BCMAxCD3 bispecific antibody ( $P \leq .01$ ). Bar graphs represent the mean and lines the standard deviation (from five independent experiments).

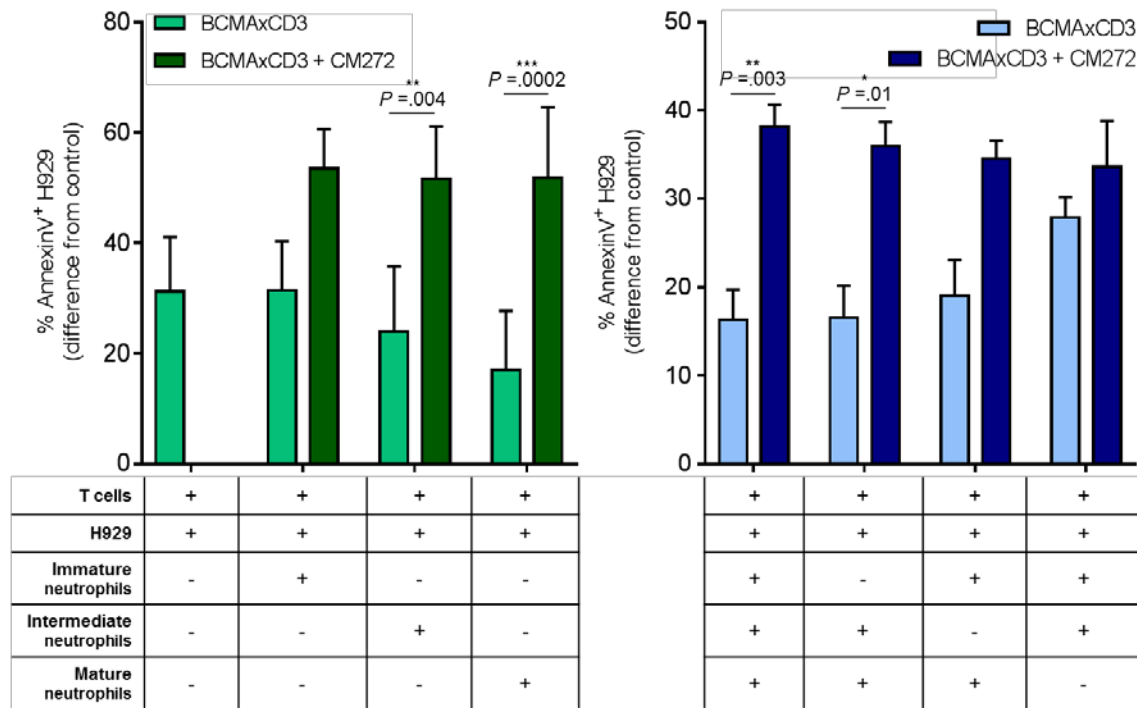

Supplement: bloodbld2019004537-suppl1.pdf [file bloodbld2019004537-suppl1.pdf]
